# Supplementary material for: Synthesis of Peripherally Tetrasubstituted Phthalocyanines and Their Applications in Schottky Barrier Diodes
Source: Hindawi journal article supplement (doi:10.1155/2017/9715069), 2017-01-01
Supplement: f1 [file 9715069.f1.doc]

**Supplementary Materials**

**Synthesis of peripherally tetra substituted phthalocyanines and their applications in Schottky barrier diodes**

Semih Gorduk1,*, Ozge Koyun1, Oguzhan Avciata2, Ahmet Altindal3, Ulvi Avciata1,*

1Yildiz Technical University, Faculty of Arts and Science, Department of Chemistry, Esenler-34210, Istanbul

2Yildiz Technical University, Faculty of Chemistry- Metallurgical, Department of Metallurgical and Materials Engineering, Esenler-34210, Istanbul, Turkey

3Yildiz Technical University, Faculty of Arts and Science, Department of Physics, Esenler-34210, Istanbul

*Corresponding Authors:

Semih Gorduk;

E-mail: sgorduk@yildiz.edu.tr

TEL: 0212 383 42 19

Ulvi Avciata;

E-mail: [uavciata@yildiz.edu.tr](mailto:uavciata@yildiz.edu.tr)

TEL: 0 212 383 41 31

**Table of contents:**

**Fig. S1.** 1H-NMR spectrum of compound **1**

**Fig. S2.** 13C-NMR spectrum of compound **1**

**Fig. S3.** 1H-NMR spectrum of compound **2**

**Fig. S4.** 1H-NMR spectrum of compound **3**

**Fig. S5.** 1H-NMR spectrum of compound **5**

**Fig. S1.** 1H-NMR spectrum of compound **1**

**Fig. S2.** 13C-NMR spectrum of compound **1**

**Fig. S3.** 1H NMR spectrum of compound **2**

**Fig. S4.** 1H-NMR spectrum of compound **3**


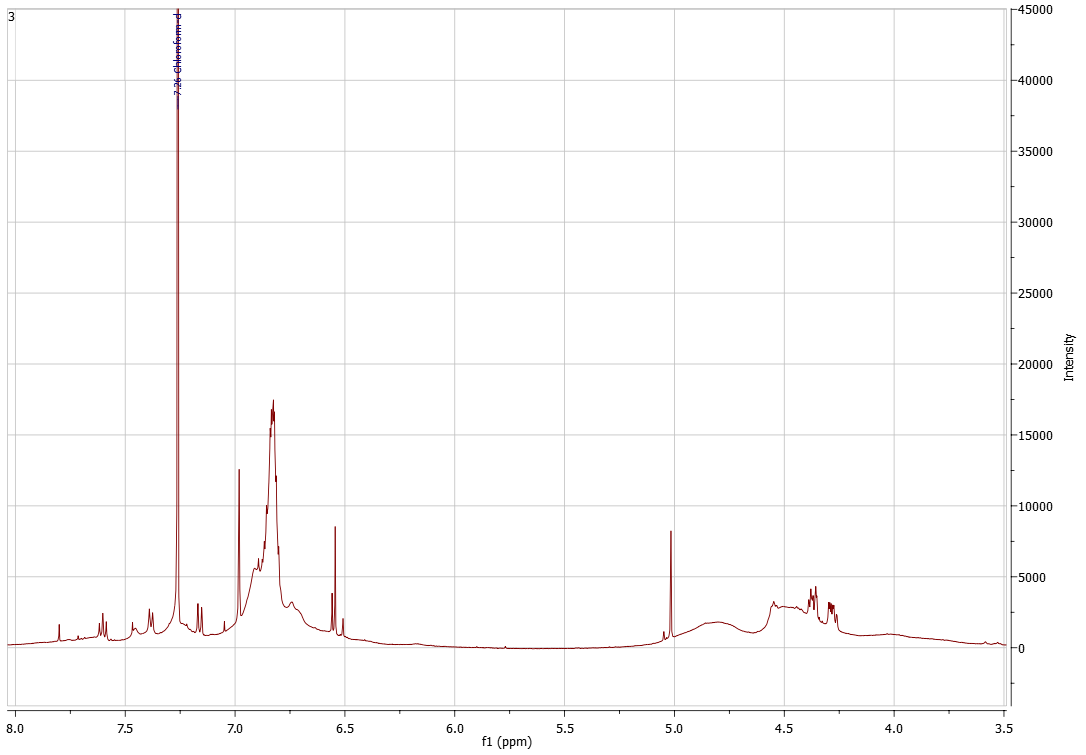


**Fig. S5.** 1H-NMR spectrum of compound **5**
